# Supplementary material for: Hematopoietic stem and progenitor cells regulate the regeneration of their niche by secreting Angiopoietin-1
Source: eLife journal article supplement (doi:10.7554/elife.05521), 2015-03-30
Supplement: supp [file elife-05521-supp-v1.zip]

*Col1a1\*2.3-cre; Angpt1<sup>fl/fl</sup>*

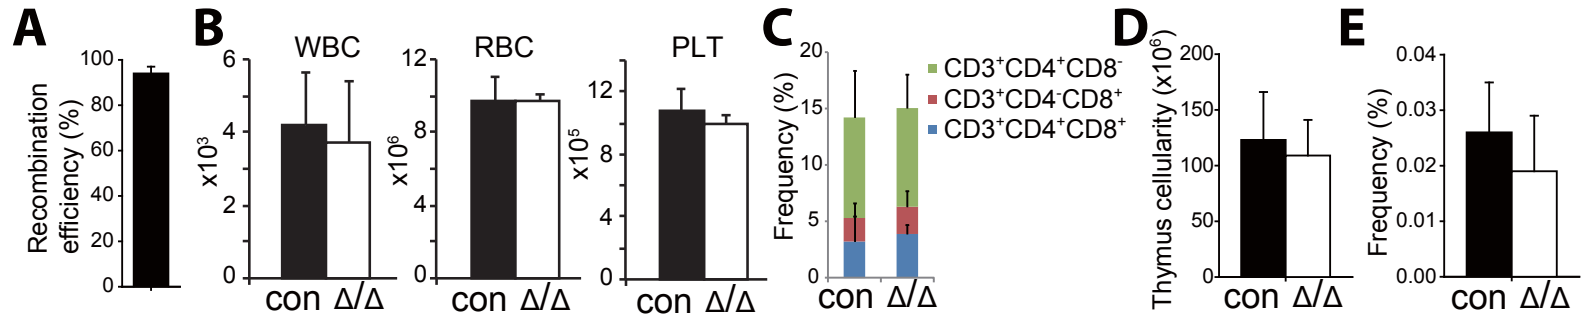

*Lepr<sup>cre</sup>; Angpt1<sup>fl/GFP</sup>*

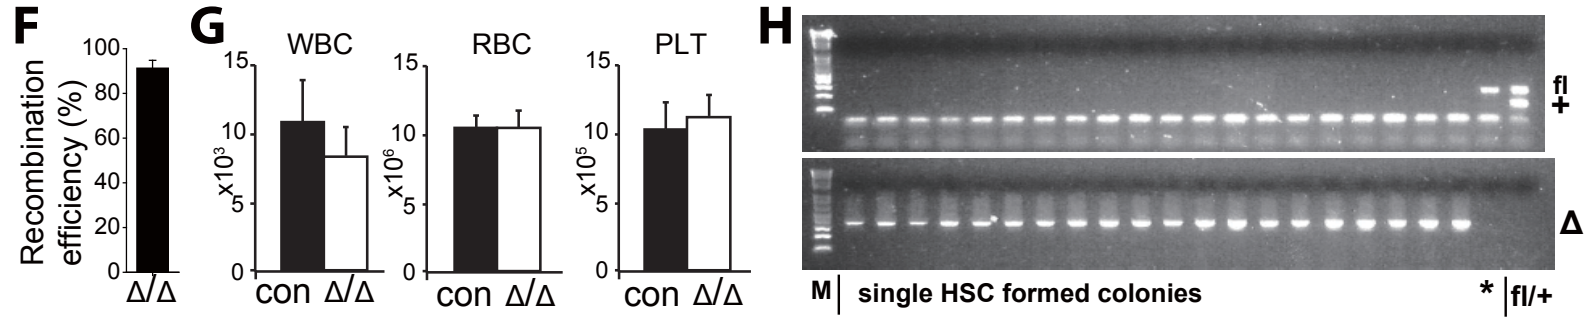

*Mx1-cre; Angpt1<sup>fl/fl</sup>*

*Mx1-cre; Angpt1<sup>fl/fl</sup>*

*UBC-cre/ER; Angpt1<sup>fl/fl</sup>*

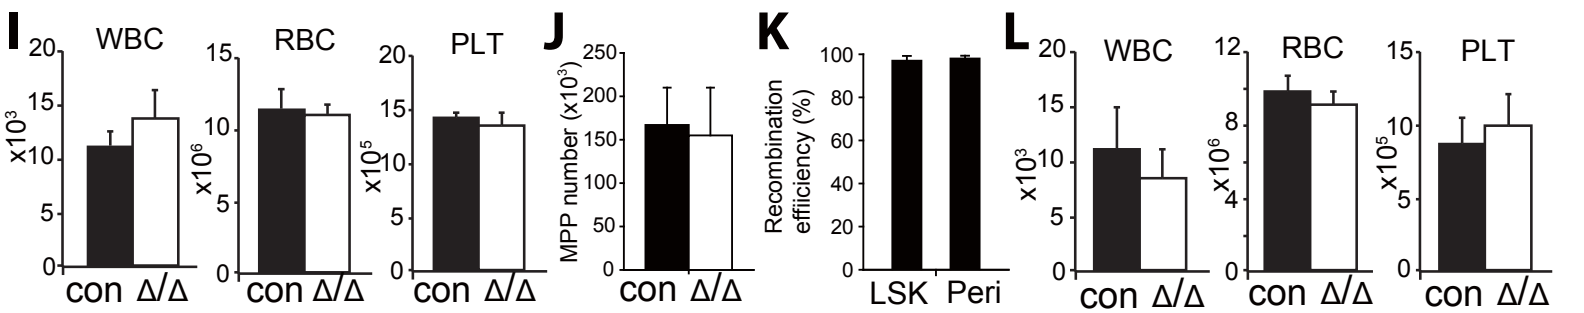

Figure 3-figure supplement 2
