# Supplementary figures and images for: Hematopoietic stem and progenitor cells regulate the regeneration of their niche by secreting Angiopoietin-1
Source: eLife journal article supplement (doi:10.7554/elife.05521), 2015-03-30

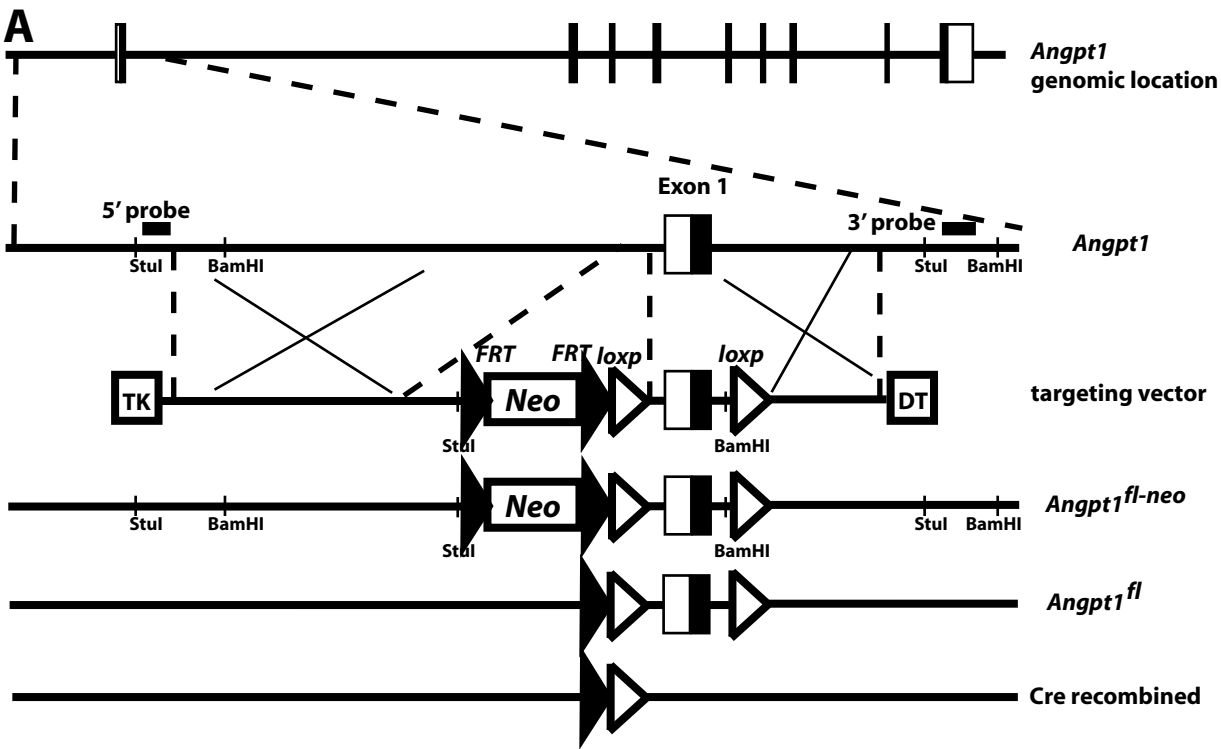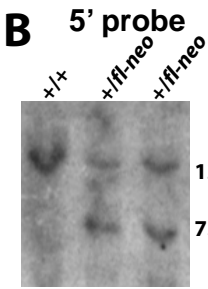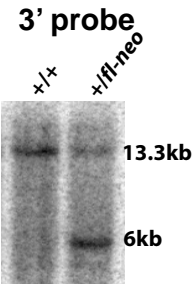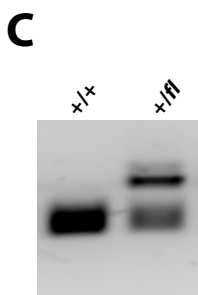

**D**

| Litter from het X het | +/+ | +/- | -/- |
|-----------------------|-----|-----|-----|
| Genotyped at P10      | 17  | 32  | 0   |
| Genotyped at E12.5    | 5   | 16  | 4   |

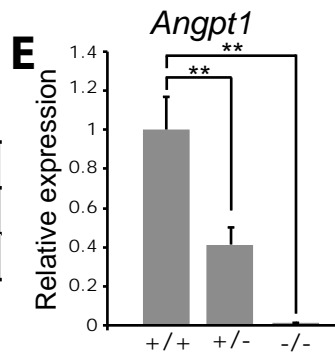

Figure 3-figure supplement 1

Supplement: supp [file elife-05521-supp-v1.zip]

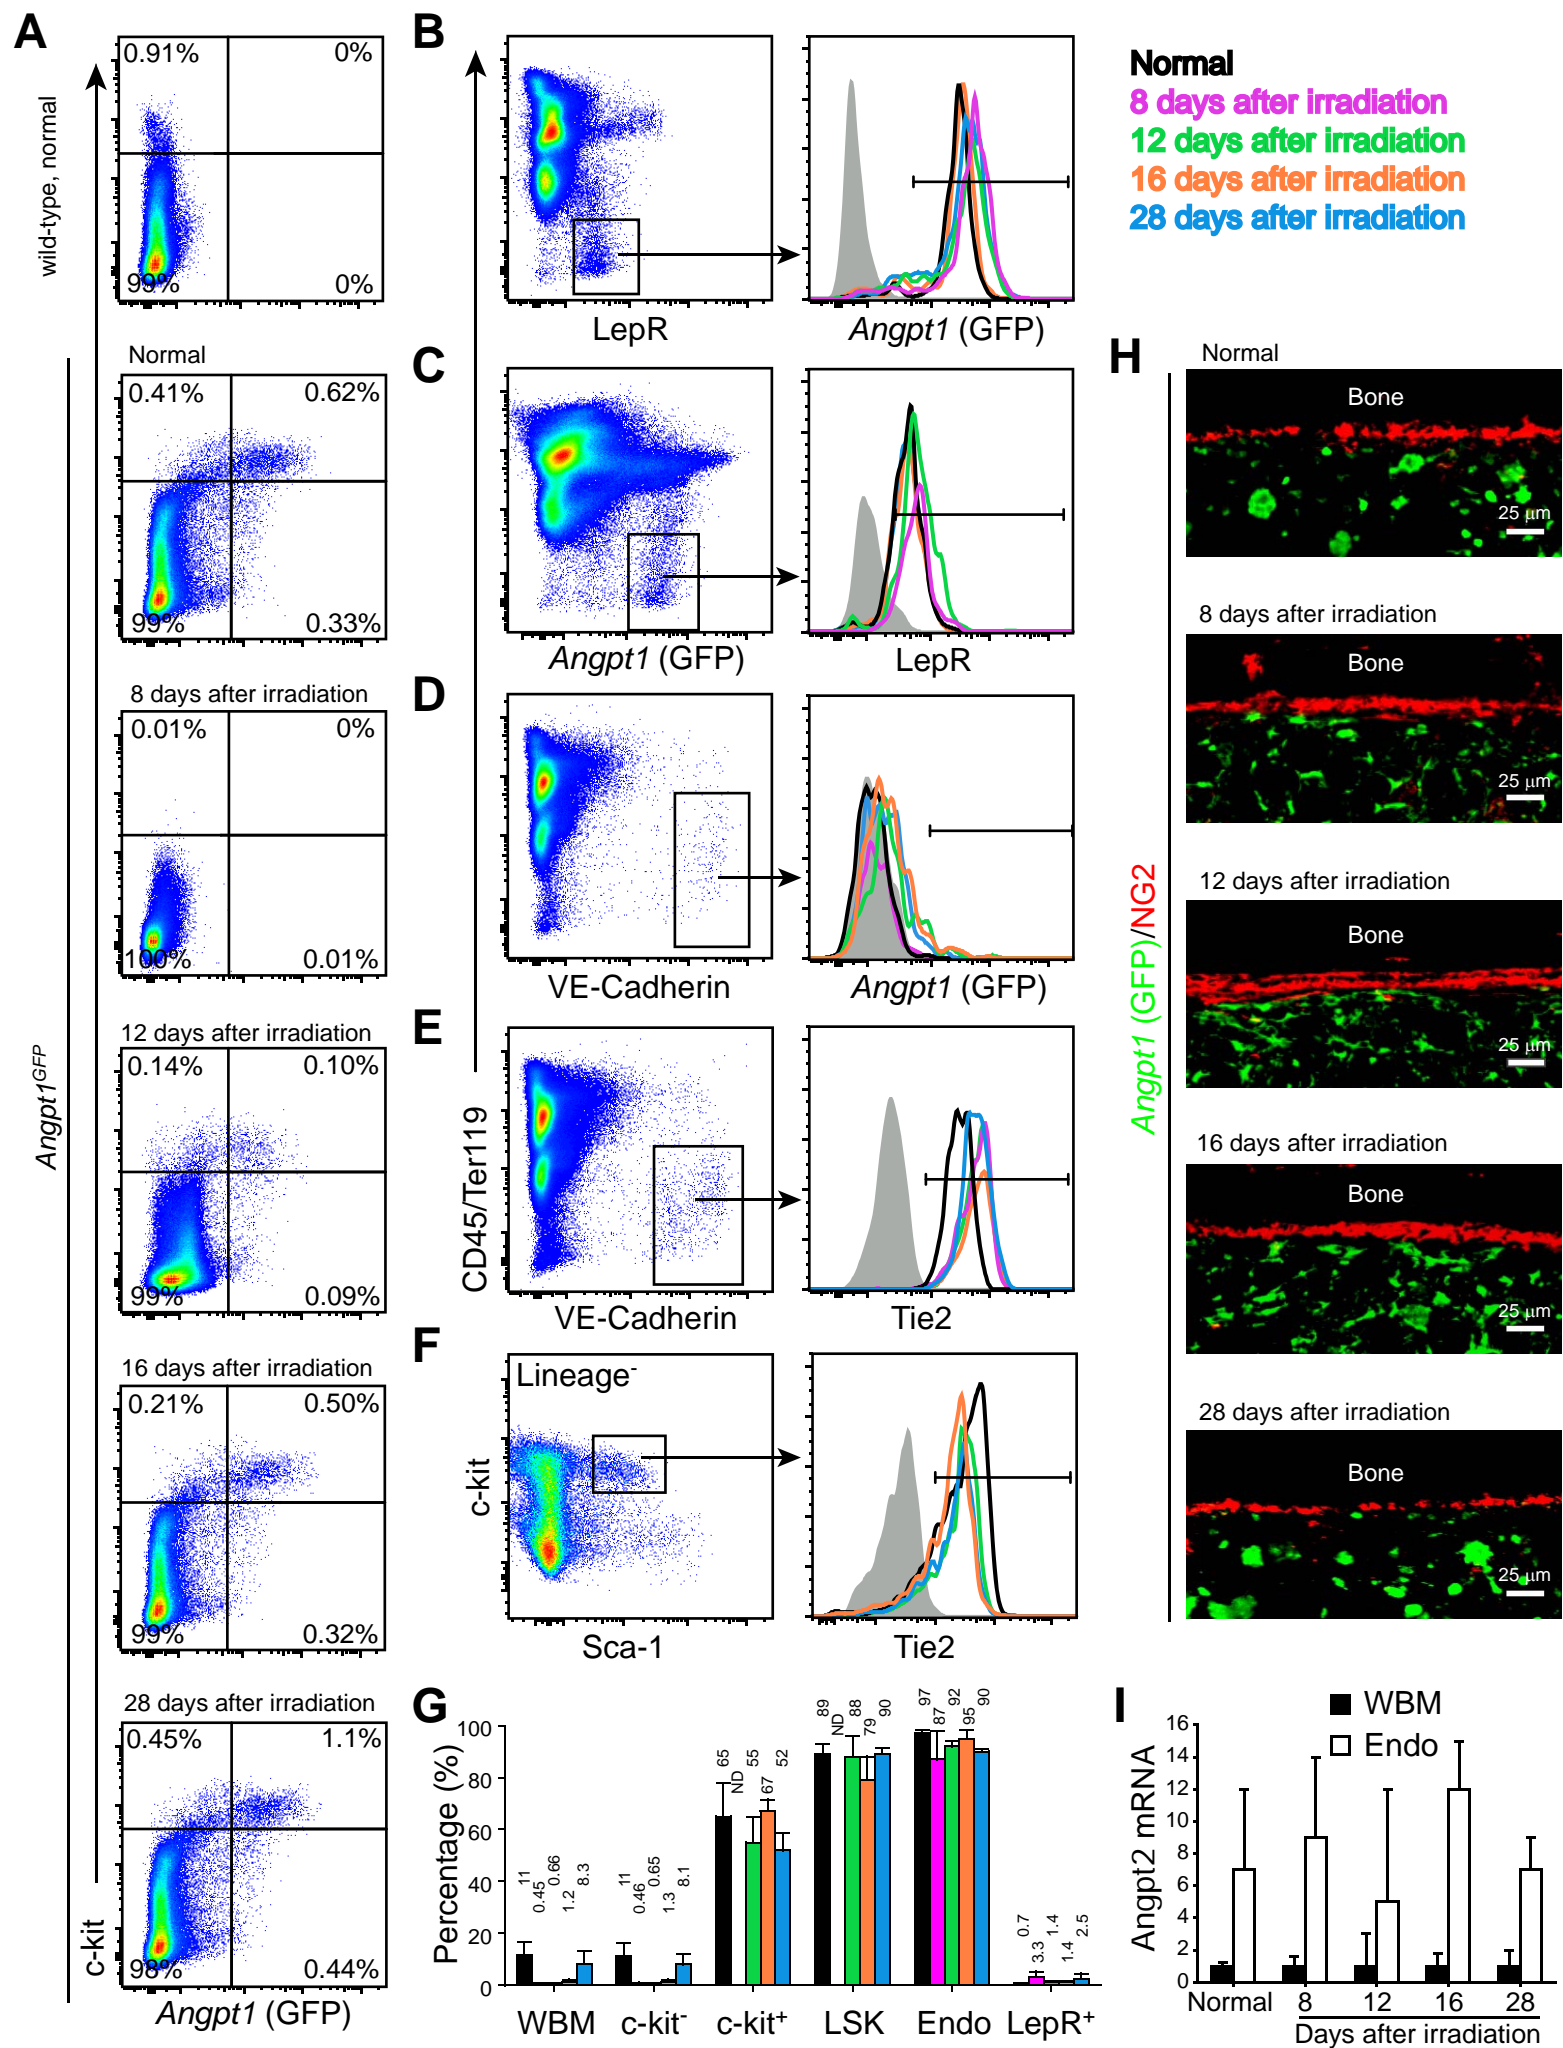

Supplement: supp [file elife-05521-supp-v1.zip]

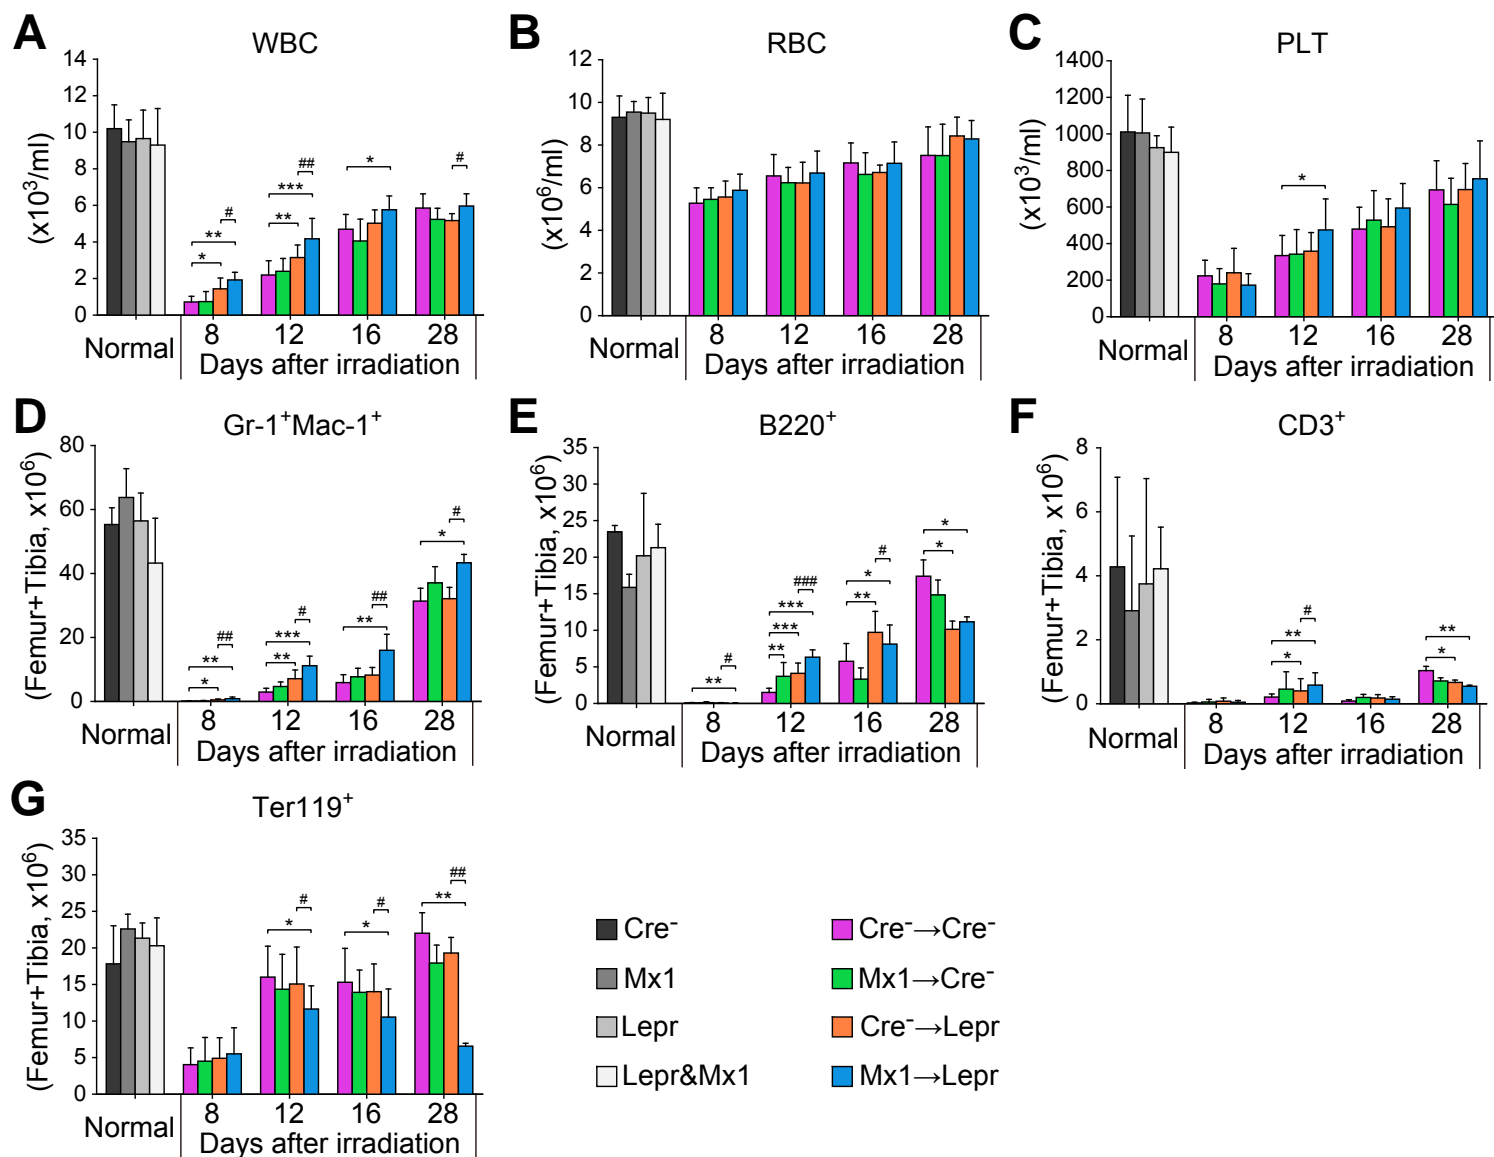

Figure 6-figure supplement 1

Supplement: supp [file elife-05521-supp-v1.zip]

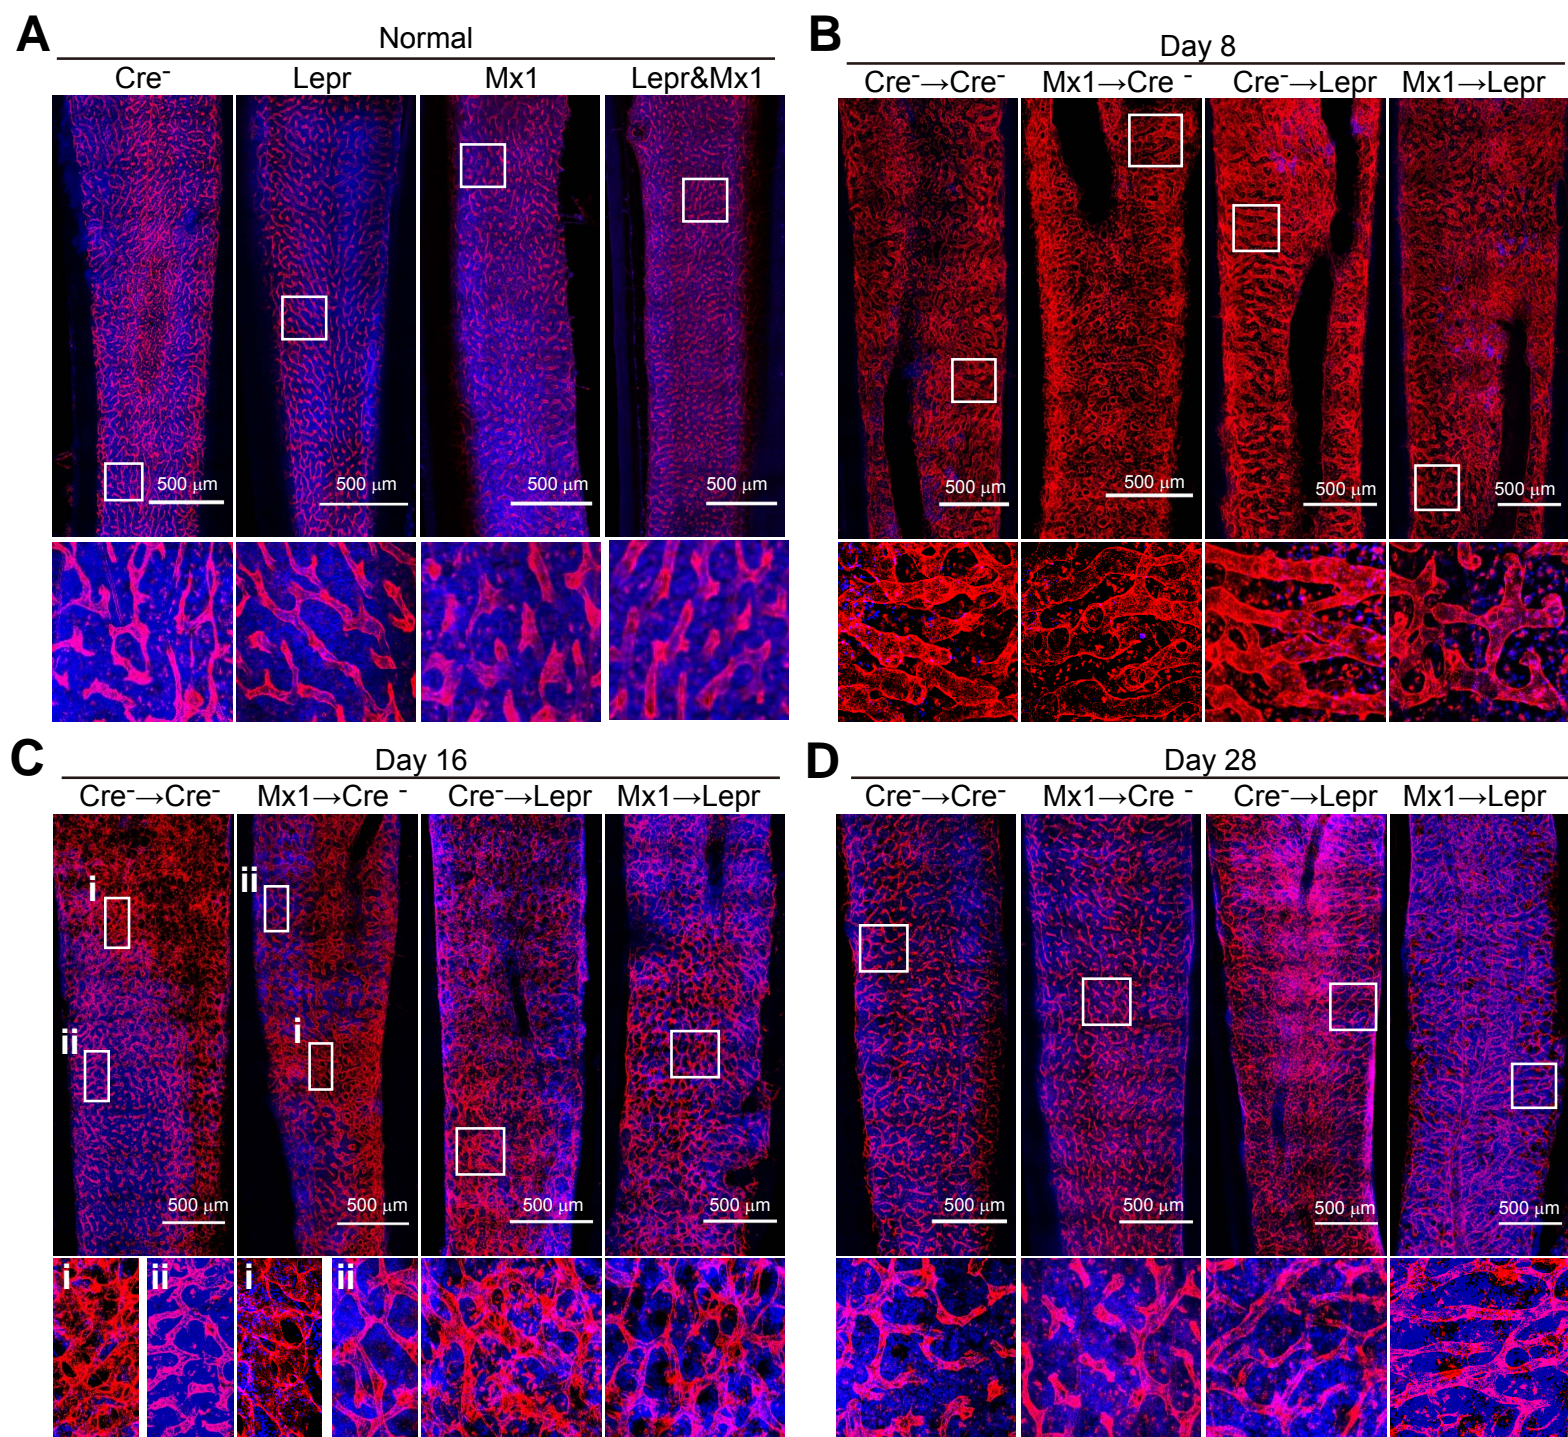

Figure 7-figure supplement 1

Supplement: supp [file elife-05521-supp-v1.zip]

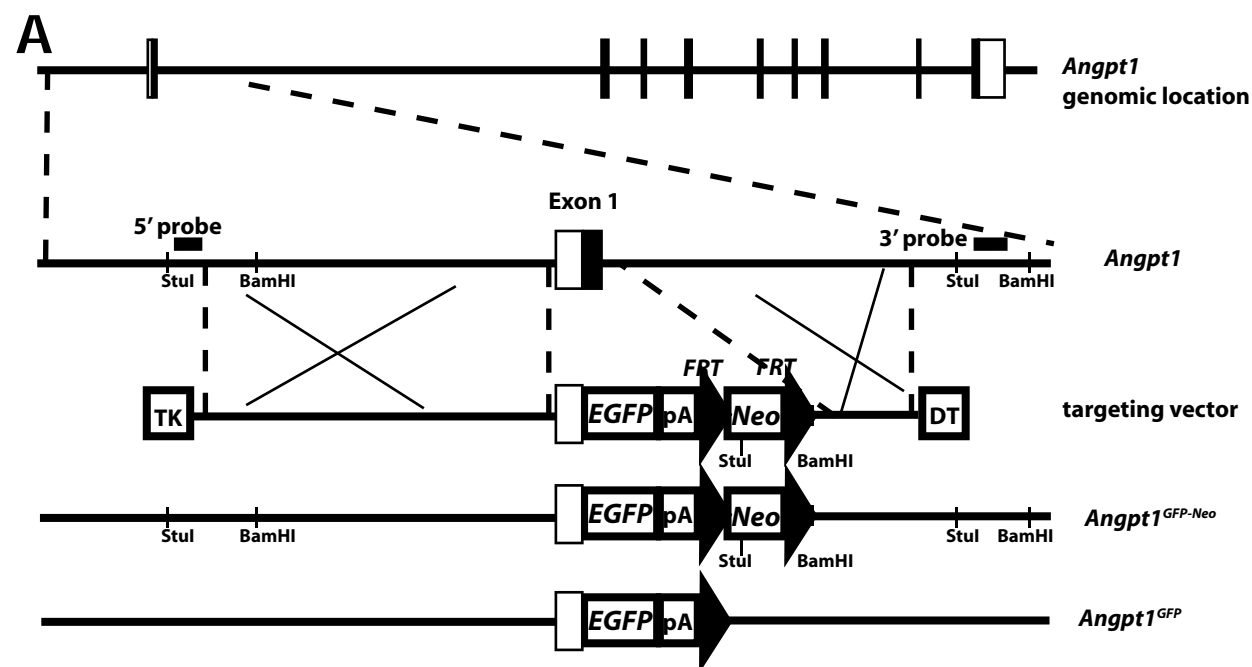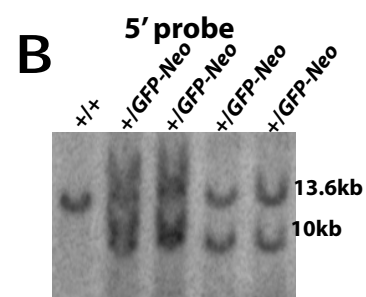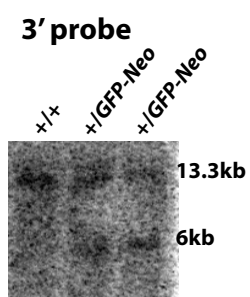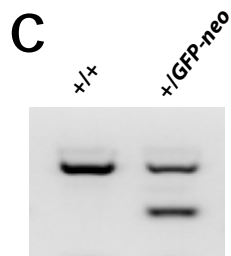

**D**

| Litter from het X het | +/+ | <i>GFP</i> /+ | <i>GFP</i> / <i>GFP</i> |
|-----------------------|-----|---------------|-------------------------|
| Genotyped at P0.      | 15  | 26            | 0                       |

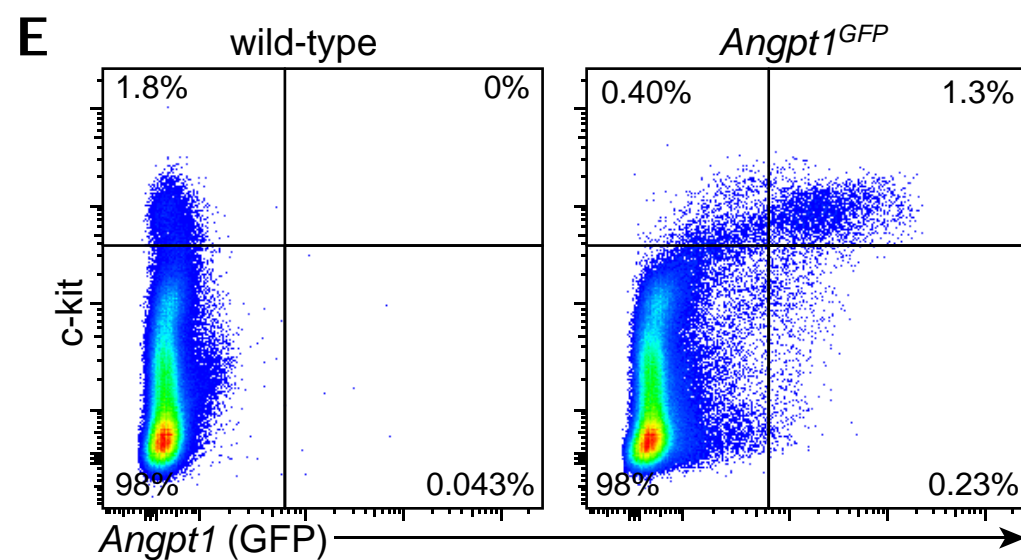

Figure 1-figure supplement 1

Supplement: supp [file elife-05521-supp-v1.zip]

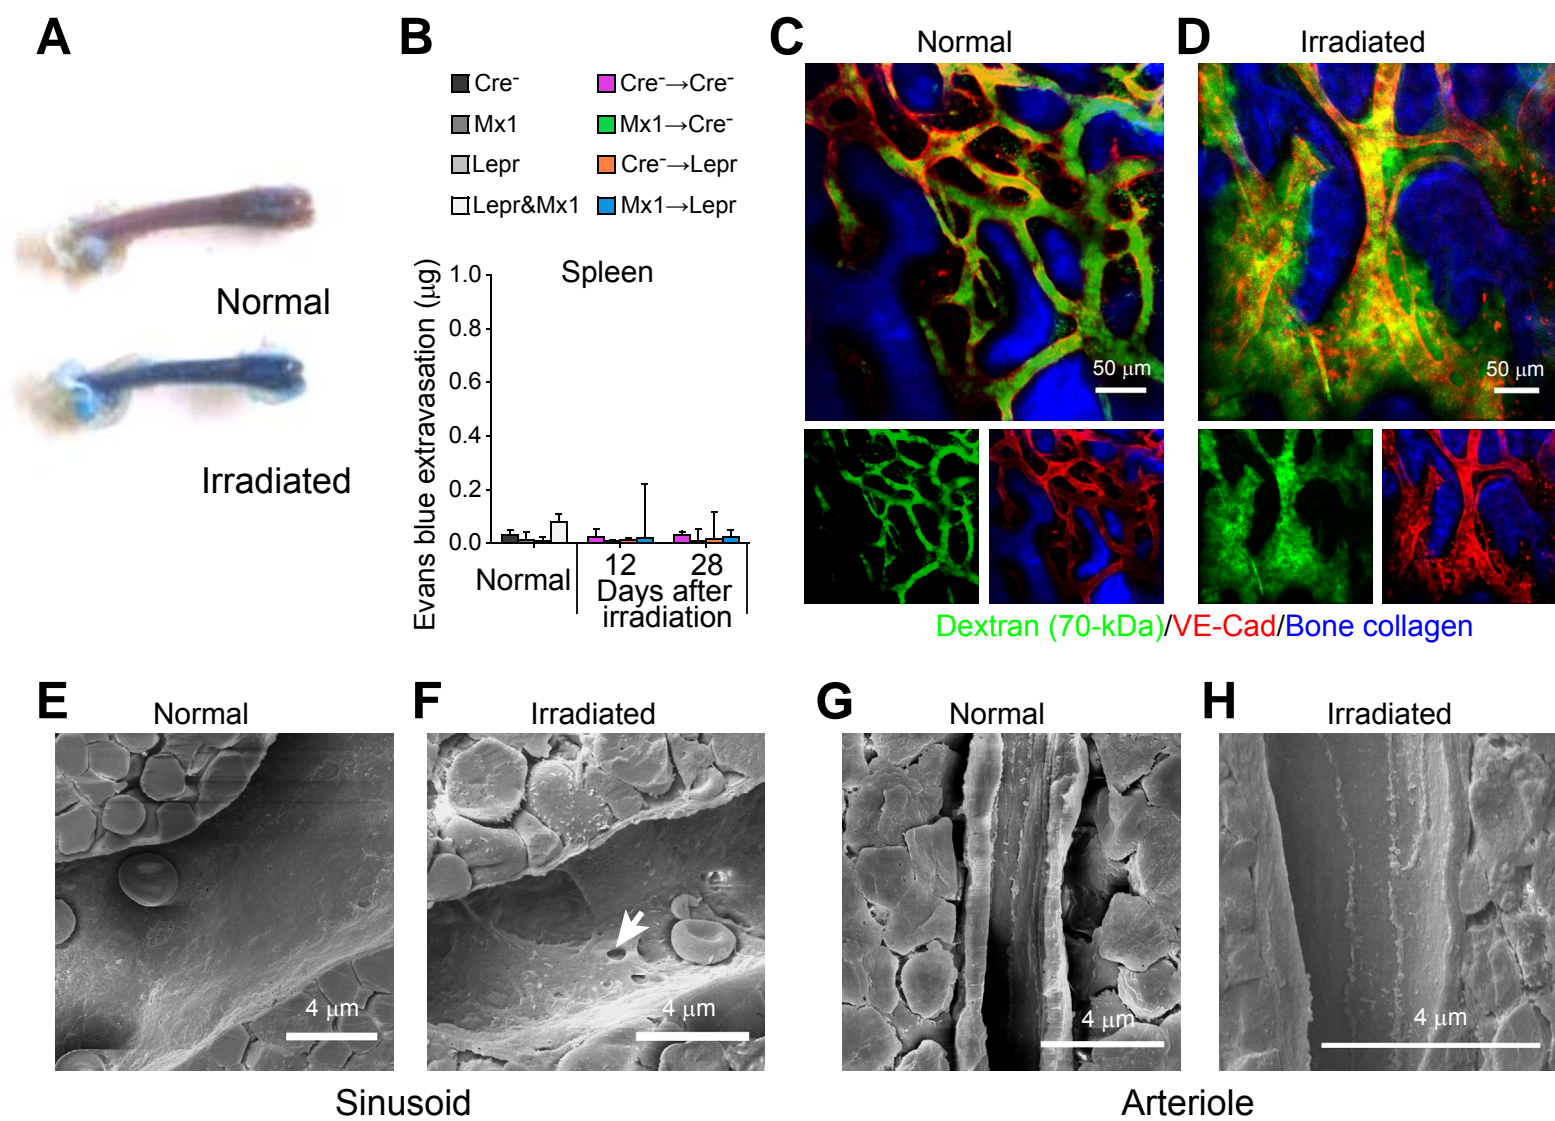

Figure 8-figure supplement 1

Supplement: supp [file elife-05521-supp-v1.zip]
